# Supplementary material for: A pleasant blue-green colored 2D vanadium dioxide inverse opal monolayer: large area fabrication and its thermochromic application
Source: Royal Society of Chemistry journal article supplement (doi:10.1039/d0tc02427a), 2020-01-01
Supplement: d0tc02427a1.pdf [file d0tc02427a1.pdf]

## A pleasant blue-green colored 2D Vanadium dioxide inverse opal monolayer: large area fabrication and its thermochromic application

Hua Li<sup>a, b</sup>, Habiba Djaoued<sup>a</sup>, Jacques Robichaud<sup>a</sup>, Yahia Djaoued<sup>a, \*</sup>

a, Laboratoire de Recherche en Matériaux et Micro-spectroscopies Raman et FTIR, Université de Moncton-Campus de Shippagan, Shippagan, NB, E8S1P6, Canada.

b, School of Materials Science and Engineering, Jingdezhen Ceramic Institute, 27 Taoyangnan Road, Jingdezhen, Jiangxi Province, 333403, PR China.

\*Corresponding Author: Yahia Djaoued, E-mail: [yahia.djaoued@umoncton.ca](mailto:yahia.djaoued@umoncton.ca)

### Figures

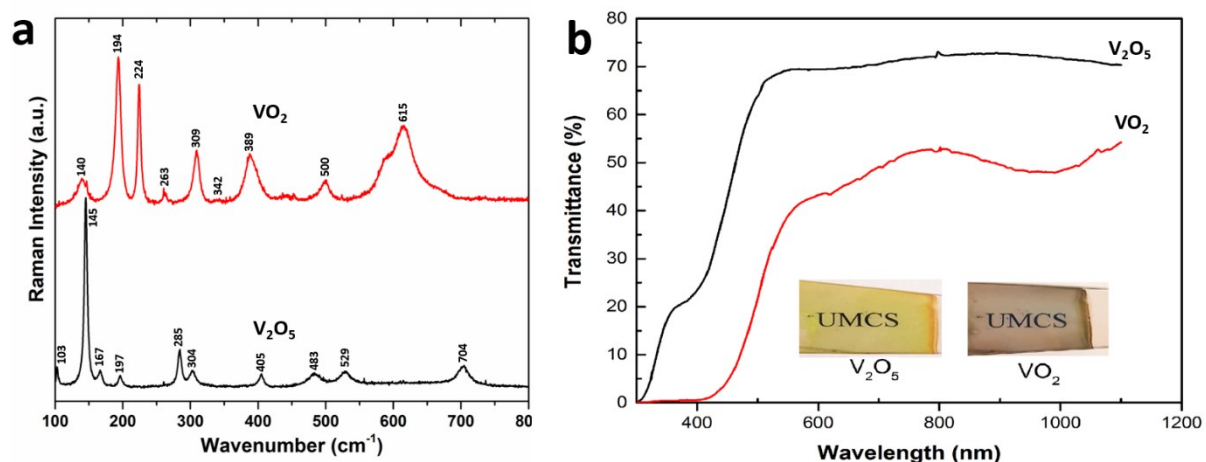

**Figure S1.** Raman spectra (a) and UV-vis NIR transmittance spectra (b) of the plain V<sub>2</sub>O<sub>5</sub> and VO<sub>2</sub> films. Inset of Figure S1 (b) shows photographs of the plain V<sub>2</sub>O<sub>5</sub> and VO<sub>2</sub> films on ITO substrates.

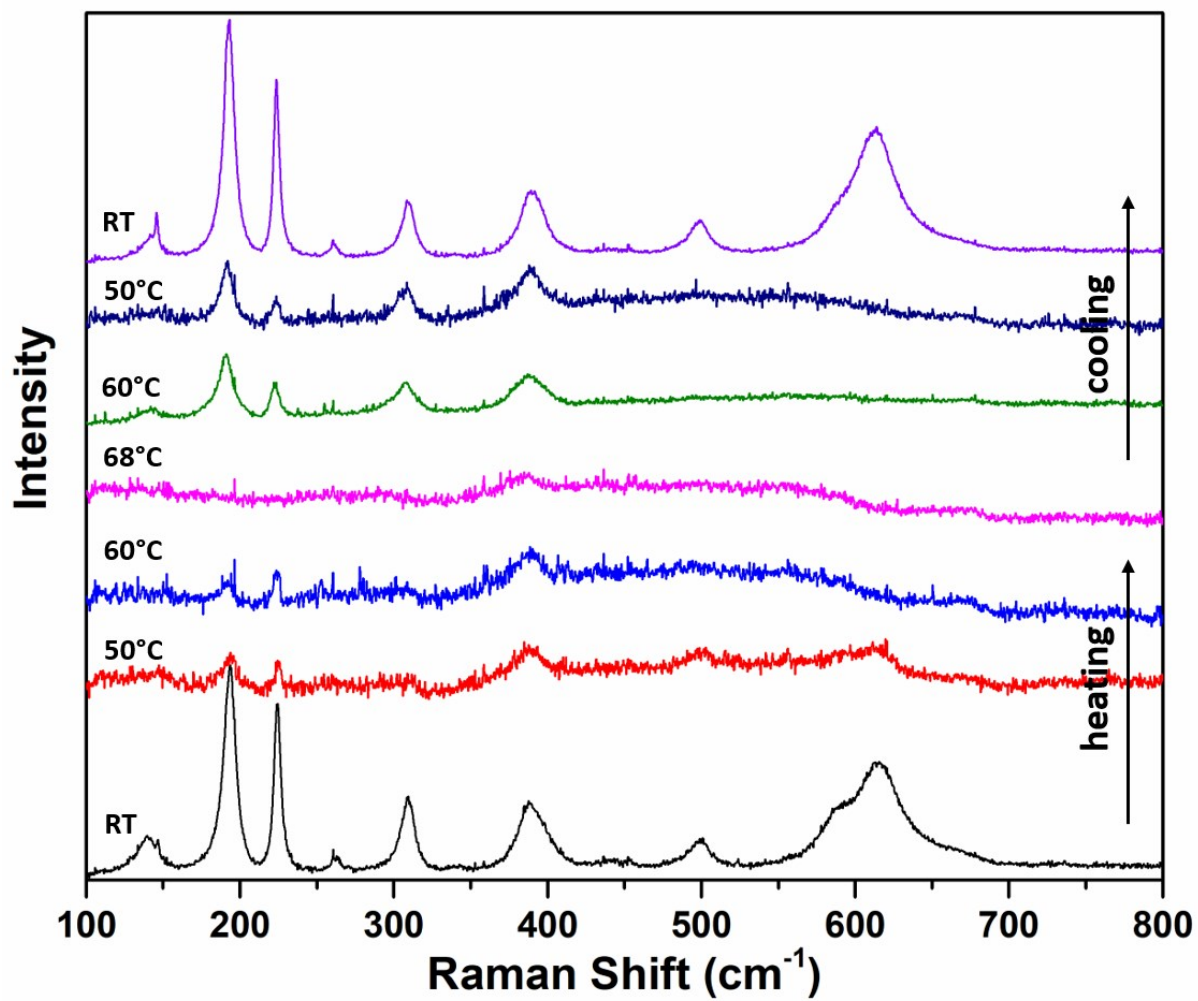

**Figure S2.** Recorded Raman spectra during a heating/cooling cycle of the plain VO<sub>2</sub> film, showing that the MIT transition is attained at around 68°C.

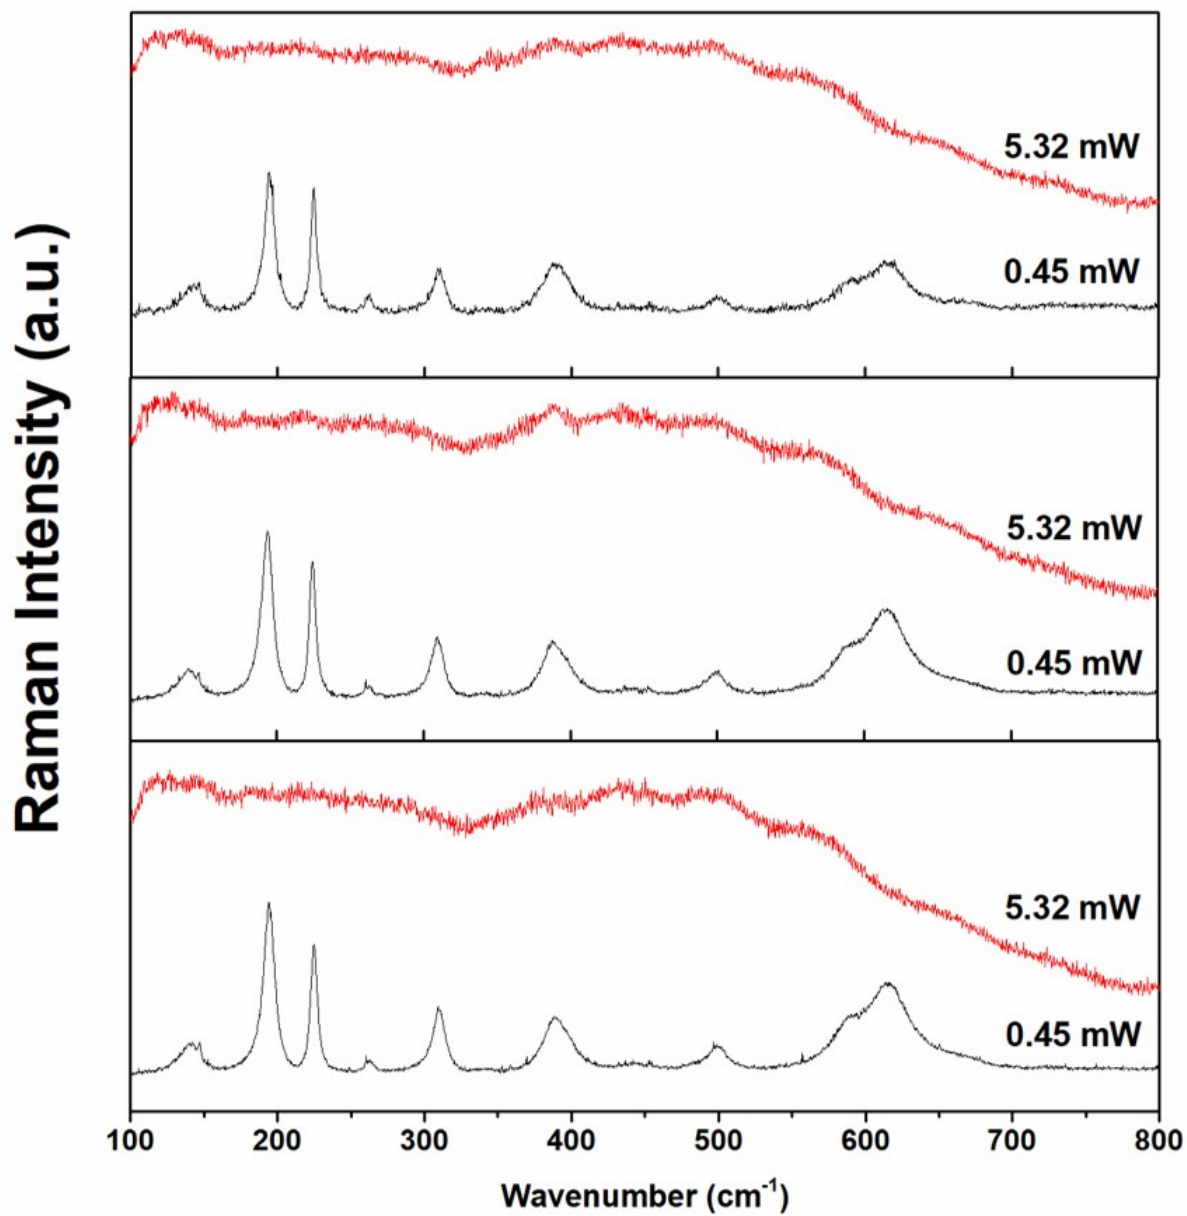

**Figure S3.** Raman spectra of the plain VO<sub>2</sub> film to test its cycling stability after applying laser stimuli (3 cycles shown).
